# Supplementary material for: Urinary Biomarkers Indicative of Apoptosis and Acute Kidney Injury in the Critically Ill
Source: PLOS journal article supplement (doi:10.1371/journal.pone.0149956), 2016-02-26
Supplement: S6 (10.1371/journal.pone.0149956.s006) [file journal.pone.0149956.s006]

S4 Table. Characteristics of patients with and without acute kidney injury (AKI) in the validation study.

|                                                                           | AKI (n=79)       | Non-AKI (n=118)  | P-value |
|---------------------------------------------------------------------------|------------------|------------------|---------|
| Age                                                                       | 66.0 [55.0-76.0] | 62.5 [49.8-72.0] | 0.128   |
| Male sex                                                                  | 52/79 (65.8%)    | 78/118 (66.1%)   | >0.999  |
| Hypertension                                                              | 42/78 (53.8%)    | 54/116 (46.6%)   | 0.380   |
| Diabetes mellitus                                                         | 21/79 (26.6%)    | 18/118 (15.3%)   | 0.068   |
| Chronic kidney disease                                                    | 14/79 (17.7%)    | 4/117 (3.4%)     | 0.001   |
| Number of received nephrotoxic agents prior to ICU admission <sup>a</sup> | 2 [1-2]          | 1 [0-2]          | 0.005   |
| Operative admission                                                       | 28/79 (35.4%)    | 34/118 (28.8%)   | 0.327   |
| Emergency admission                                                       | 68/74 (91.9%)    | 112/117 (95.7%)  | 0.342   |
| SAPS II score                                                             | 40.0 [33.0-44.0] | 34.5 [27.0-44.0] | 0.01    |
| Non-renal non-age SAPS II score                                           | 21.0 [15.0-28.0] | 23.0 [13.0-29.8] | 0.748   |
| SOFA score, maximum                                                       | 9 [7-12]         | 6 [4-9]          | <0.001  |
| Ventilatory treatment                                                     | 53/79 (67.1%)    | 70/118 (59.3%)   | 0.296   |
| Vasoactives d1                                                            | 57/79 (72.2%)    | 51/118 (43.2%)   | <0.001  |
| Urine output, first 24h                                                   | 1365 [820-2357]  | 2760 [1813-3805] | <0.001  |
| Severe sepsis                                                             | 31/79 (39.4%)    | 26/118 (22.0%)   | 0.011   |
| Length of ICU stay                                                        | 3.9 [2.4-7.2]    | 2.2 [1.1-4.7]    | <0.001  |
| Dead by day 90                                                            | 22/79 (27.8%)    | 22/118 (18.6%)   | 0.163   |

Data expressed as median [IQR] or number/total number (%).ICU; intensive care unit, SAPS; Simplified Acute Physiology Score, SOFA; Sequential Organ Dysfunction Assessment

<sup>a</sup> Included (maximum of 6): radiocontrast agent, aminoglycan or peptidoglycan antibiotics, angiotensin converting enzyme inhibitors or angiotensin receptor blockers, non-steroidal anti-inflammatory drugs, diuretics or hydroxyethyl starch.
